# Supplementary material
Source: publisher figshare collection journal article supplement (https://tandf.figshare.com/ndownloader/files/22664759)
Supplement: Supplementary file 1 [file 22664759]

## Supplementary Materials

Table S1. Descriptive statistics of employment status in adulthood

| Employment status in adulthood | 2004 |      | 2010 |      |
|--------------------------------|------|------|------|------|
|                                | Mean | S.D. | Mean | S.D. |
| Contributory family worker     | 0.30 | 0.46 | 0.03 | 0.17 |
| Own account worker             | 0.15 | 0.36 | 0.56 | 0.50 |
| Employer                       | 0.21 | 0.41 | 0.14 | 0.35 |
| Employee                       | 0.19 | 0.40 | 0.22 | 0.42 |
| Other                          | 0.14 | 0.35 | 0.04 | 0.21 |
| Vulnerable employment          | 0.46 | 0.50 | 0.59 | 0.49 |
| Obs.                           | 548  |      | 669  |      |

Authors' elaboration on the KHDS

Table S2. Distribution of age in childhood.

| Age   | 1992  |         |        | 1993  |         |        |
|-------|-------|---------|--------|-------|---------|--------|
|       | Freq. | Percent | Cum.   | Freq. | Percent | Cum.   |
| 6     | 1     | 0.18    | 0.18   | -     | -       | -      |
| 7     | 17    | 3.10    | 3.28   | 7     | 1.05    | 1.05   |
| 8     | 28    | 5.11    | 8.39   | 27    | 4.04    | 5.08   |
| 9     | 56    | 10.22   | 18.61  | 55    | 8.22    | 13.30  |
| 10    | 63    | 11.50   | 30.11  | 63    | 9.42    | 22.72  |
| 11    | 74    | 13.50   | 43.61  | 87    | 13.00   | 35.72  |
| 12    | 89    | 16.24   | 59.85  | 100   | 14.95   | 50.67  |
| 13    | 123   | 22.45   | 82.30  | 102   | 15.25   | 65.92  |
| 14    | 97    | 17.70   | 100.00 | 133   | 19.88   | 85.80  |
| 15    | -     | -       | -      | 95    | 14.20   | 100.00 |
| Total | 548   | 100.00  |        | 669   | 100.00  |        |

Authors' elaboration on the KHDS

Table S3. Child labour effect on the employment status in adulthood, linear probability model with fixed effects. Male sample.

|                                    | (1)<br>Contributing<br>family worker | (2)<br>Own-account<br>worker | (3)<br>Employer   | (4)<br>Employee   | (5)<br>Other       | (6)<br>Vulnerable<br>employment |
|------------------------------------|--------------------------------------|------------------------------|-------------------|-------------------|--------------------|---------------------------------|
| (a) Child labour hours             | 0.000<br>(0.010)                     | -0.001<br>(0.014)            | -0.015<br>(0.015) | 0.005<br>(0.017)  | 0.011<br>(0.008)   | -0.001<br>(0.014)               |
| Child labour hours*age             | -0.000<br>(0.001)                    | 0.000<br>(0.001)             | 0.001<br>(0.001)  | -0.000<br>(0.001) | -0.001<br>(0.001)  | 0.000<br>(0.001)                |
| (b) Hours spent in domestic chores | -0.003<br>(0.017)                    | 0.001<br>(0.026)             | -0.005<br>(0.024) | -0.013<br>(0.035) | 0.020*<br>(0.011)  | -0.002<br>(0.035)               |
| Hours domestic chores*age          | 0.000<br>(0.001)                     | -0.000<br>(0.002)            | 0.001<br>(0.002)  | 0.001<br>(0.003)  | -0.002*<br>(0.001) | -0.000<br>(0.003)               |
| Hours spent on the HH farm         | 0.001<br>(0.012)                     | -0.003<br>(0.018)            | -0.024<br>(0.017) | 0.022<br>(0.020)  | 0.005<br>(0.015)   | -0.002<br>(0.014)               |
| Hours HH farm*age                  | -0.000<br>(0.001)                    | 0.000<br>(0.001)             | 0.002<br>(0.001)  | -0.002<br>(0.002) | -0.000<br>(0.001)  | 0.000<br>(0.001)                |

\*\*\* p<0.01, \*\* p<0.05, \* p<0.1.

Notes: Panel (a) presents results for total child labour hours while panel (b) disaggregates them into hours spent in domestic chores and on the household farm for all 7-15 years old boys. Each regression has a common set of controls: age, education, rural area of residence, quintile of household expenditure, number of household members and number of household members in employment, marital status, religion, loss of parents and community shocks during childhood. Cluster-robust standard errors at household level are in parentheses.

Table S4. Child labour hours and employment status in adulthood, linear probability model with fixed effects. Whole sample.

|                                     | (1)                           | (2)                   | (3)       | (4)      | (5)       | (6)                      |
|-------------------------------------|-------------------------------|-----------------------|-----------|----------|-----------|--------------------------|
|                                     | Contributing<br>family worker | Own-account<br>worker | Employer  | Employee | Other     | Vulnerable<br>employment |
| Child labour hours                  | 0.020*                        | 0.001                 | -0.022*   | -0.002   | 0.004     | 0.020**                  |
|                                     | (0.010)                       | (0.010)               | (0.011)   | (0.009)  | (0.008)   | (0.010)                  |
| Child labour hours*age              | -0.002**                      | -0.000                | 0.002**   | 0.000    | -0.000    | -0.002**                 |
|                                     | (0.001)                       | (0.001)               | (0.001)   | (0.001)  | (0.001)   | (0.001)                  |
| Age                                 | -0.210***                     | 0.465***              | -0.178*** | 0.056*   | -0.134*** | 0.256***                 |
|                                     | (0.034)                       | (0.037)               | (0.046)   | (0.032)  | (0.019)   | (0.053)                  |
| Community shocks                    | -0.066                        | 0.159***              | -0.129**  | 0.042    | -0.007    | 0.093*                   |
|                                     | (0.040)                       | (0.050)               | (0.052)   | (0.028)  | (0.024)   | (0.051)                  |
| HH size                             | -0.010                        | 0.014                 | -0.037*** | -0.012   | 0.045***  | 0.004                    |
|                                     | (0.011)                       | (0.013)               | (0.010)   | (0.009)  | (0.007)   | (0.013)                  |
| Weekly hours of school (2° tertile) | -0.064                        | 0.100**               | -0.020    | -0.034   | 0.017     | 0.036                    |
|                                     | (0.044)                       | (0.045)               | (0.050)   | (0.042)  | (0.027)   | (0.050)                  |
| Weekly hours of school (3° tertile) | -0.038                        | -0.022                | 0.043     | 0.002    | 0.015     | -0.060                   |
|                                     | (0.049)                       | (0.050)               | (0.056)   | (0.035)  | (0.027)   | (0.074)                  |
| Uncompleted primary school          | -0.132                        | -0.012                | -0.077    | 0.029    | 0.193     | -0.145                   |
|                                     | (0.129)                       | (0.134)               | (0.191)   | (0.090)  | (0.160)   | (0.115)                  |
| Primary school                      | -0.167*                       | 0.141*                | -0.116    | -0.012   | 0.154     | -0.026                   |

|                                 |          |          |           |         |           |         |
|---------------------------------|----------|----------|-----------|---------|-----------|---------|
|                                 | (0.099)  | (0.076)  | (0.160)   | (0.076) | (0.148)   | (0.058) |
| Secondary school                | -0.036   | 0.107    | 0.017     | -0.126  | 0.039     | 0.071   |
|                                 | (0.092)  | (0.091)  | (0.173)   | (0.131) | (0.158)   | (0.071) |
| University                      | 0.255*** | -0.193   | -0.187    | 0.451** | -0.327*   | 0.062   |
|                                 | (0.067)  | (0.127)  | (0.153)   | (0.185) | (0.175)   | (0.102) |
| Married                         | 0.102*** | -0.127** | 0.173***  | -0.015  | -0.134*** | -0.024  |
|                                 | (0.037)  | (0.048)  | (0.048)   | (0.044) | (0.028)   | (0.052) |
| No. of HH members in employment | 0.073*** | -0.031   | 0.079***  | 0.025   | -0.145*** | 0.041*  |
|                                 | (0.014)  | (0.022)  | (0.016)   | (0.020) | (0.018)   | (0.022) |
| Orphan in adulthood             | -0.038   | -0.007   | -0.033    | 0.007   | 0.071*    | -0.044  |
|                                 | (0.067)  | (0.088)  | (0.080)   | (0.073) | (0.035)   | (0.090) |
| Rural area                      | 0.064    | 0.078    | -0.144*** | 0.028   | -0.026    | 0.142*  |
|                                 | (0.054)  | (0.069)  | (0.045)   | (0.046) | (0.024)   | (0.071) |
| HH expenditure (2° quartile)    | -0.089   | 0.048    | 0.020     | -0.004  | 0.025     | -0.041  |
|                                 | (0.060)  | (0.049)  | (0.058)   | (0.053) | (0.020)   | (0.057) |
| HH expenditure (3° quartile)    | -0.076** | 0.016    | 0.047     | -0.060  | 0.073***  | -0.060  |
|                                 | (0.032)  | (0.048)  | (0.038)   | (0.048) | (0.020)   | (0.046) |
| HH expenditure (4° quartile)    | -0.047   | -0.062   | 0.012     | 0.076   | 0.021     | -0.109  |
|                                 | (0.043)  | (0.057)  | (0.077)   | (0.044) | (0.036)   | (0.068) |
| Catholic                        | 0.011    | -0.003   | 0.001     | 0.044   | -0.053    | 0.008   |
|                                 | (0.058)  | (0.098)  | (0.082)   | (0.110) | (0.059)   | (0.115) |
| Protestant                      | 0.053    | 0.041    | -0.070    | -0.024  | -0.000    | 0.094   |

|                  |          |           |          |         |          |           |
|------------------|----------|-----------|----------|---------|----------|-----------|
|                  | (0.050)  | (0.071)   | (0.075)  | (0.094) | (0.048)  | (0.095)   |
| Muslim           | 0.164**  | 0.020     | -0.218   | 0.010   | 0.024    | 0.184     |
|                  | (0.078)  | (0.138)   | (0.130)  | (0.118) | (0.078)  | (0.148)   |
| Constant         | 2.757*** | -5.428*** | 2.566*** | -0.486  | 1.591*** | -2.671*** |
|                  | (0.481)  | (0.407)   | (0.555)  | (0.399) | (0.329)  | (0.658)   |
| No. Observations | 1,217    | 1,217     | 1,217    | 1,217   | 1,217    | 1,217     |
| R-squared        | 0.316    | 0.388     | 0.117    | 0.065   | 0.328    | 0.114     |

---

\*\*\* p<0.01, \*\* p<0.05, \* p<0.10. Cluster-robust standard errors at household level in parentheses.

Notes: we also control for household expenditure during childhood and parents' education and household size during childhood.

Table S5. Child labour hours and employment status in adulthood, linear probability model with fixed effects. Female sample.

|                                     | (1)                           | (2)                   | (3)                 | (4)                 | (5)                  | (6)                      |
|-------------------------------------|-------------------------------|-----------------------|---------------------|---------------------|----------------------|--------------------------|
|                                     | Contributing<br>family worker | Own-account<br>worker | Employer            | Employee            | Other                | Vulnerable<br>employment |
| Child labour hours                  | 0.045**<br>(0.018)            | 0.001<br>(0.013)      | -0.030*<br>(0.017)  | -0.015**<br>(0.007) | -0.000<br>(0.012)    | 0.046**<br>(0.020)       |
| Child labour hours*age              | -0.004**<br>(0.001)           | -0.000<br>(0.001)     | 0.002*<br>(0.001)   | 0.001**<br>(0.001)  | 0.000<br>(0.001)     | -0.004**<br>(0.002)      |
| Age                                 | -0.269***<br>(0.054)          | 0.504***<br>(0.050)   | -0.041<br>(0.056)   | 0.011<br>(0.036)    | -0.205***<br>(0.033) | 0.235***<br>(0.078)      |
| Community shocks                    | -0.103*<br>(0.056)            | 0.239***<br>(0.073)   | -0.142**<br>(0.052) | -0.005<br>(0.035)   | 0.011<br>(0.033)     | 0.136*<br>(0.068)        |
| HH size                             | -0.035*<br>(0.019)            | 0.022<br>(0.019)      | -0.016<br>(0.013)   | -0.008<br>(0.016)   | 0.036***<br>(0.009)  | -0.013<br>(0.017)        |
| Weekly hours of school (2° tertile) | -0.099<br>(0.064)             | 0.092*<br>(0.052)     | -0.024<br>(0.077)   | -0.032<br>(0.037)   | 0.063<br>(0.040)     | -0.007<br>(0.064)        |
| Weekly hours of school (3° tertile) | -0.024<br>(0.061)             | 0.001<br>(0.059)      | 0.010<br>(0.077)    | -0.015<br>(0.053)   | 0.027<br>(0.048)     | -0.022<br>(0.084)        |
| Uncompleted primary school          | -0.133<br>(0.194)             | -0.083<br>(0.222)     | 0.375<br>(0.275)    | -0.060<br>(0.075)   | -0.099<br>(0.223)    | -0.215<br>(0.163)        |
| Primary                             | -0.109                        | -0.060                | 0.262               | 0.058               | -0.150               | -0.170                   |

|                                 |          |           |          |         |           |          |
|---------------------------------|----------|-----------|----------|---------|-----------|----------|
|                                 | (0.170)  | (0.242)   | (0.259)  | (0.076) | (0.166)   | (0.165)  |
| Secondary                       | 0.305    | -0.351    | 0.337    | -0.042  | -0.249    | -0.046   |
|                                 | (0.180)  | (0.296)   | (0.262)  | (0.080) | (0.241)   | (0.209)  |
| Married                         | 0.220*** | -0.199*** | 0.150    | 0.046   | -0.217*** | 0.021    |
|                                 | (0.062)  | (0.063)   | (0.092)  | (0.071) | (0.059)   | (0.091)  |
| No. of HH members in employment | 0.164*** | -0.049    | 0.087*** | 0.010   | -0.212*** | 0.115*** |
|                                 | (0.029)  | (0.033)   | (0.030)  | (0.029) | (0.036)   | (0.038)  |
| Orphan in adulthood             | -0.082   | -0.025    | -0.102   | 0.064   | 0.145*    | -0.108   |
|                                 | (0.077)  | (0.082)   | (0.121)  | (0.065) | (0.076)   | (0.108)  |
| Rural area                      | 0.120    | -0.008    | -0.072   | 0.066   | -0.106*   | 0.112    |
|                                 | (0.092)  | (0.078)   | (0.069)  | (0.049) | (0.055)   | (0.113)  |
| HH expenditure (2° quartile)    | -0.022   | 0.039     | 0.006    | -0.059  | 0.035     | 0.017    |
|                                 | (0.085)  | (0.064)   | (0.070)  | (0.047) | (0.039)   | (0.088)  |
| HH expenditure (3° quartile)    | -0.094*  | 0.024     | 0.012    | -0.028  | 0.086**   | -0.070*  |
|                                 | (0.054)  | (0.058)   | (0.039)  | (0.046) | (0.032)   | (0.040)  |
| HH expenditure (4° quartile)    | -0.000   | -0.130    | 0.011    | 0.093   | 0.027     | -0.130   |
|                                 | (0.105)  | (0.099)   | (0.078)  | (0.055) | (0.070)   | (0.110)  |
| Catholic                        | 0.095    | -0.167    | -0.010   | 0.074   | 0.008     | -0.071   |
|                                 | (0.094)  | (0.112)   | (0.150)  | (0.085) | (0.068)   | (0.147)  |
| Protestant                      | 0.096    | -0.060    | -0.109   | 0.091   | -0.018    | 0.036    |
|                                 | (0.109)  | (0.111)   | (0.133)  | (0.113) | (0.086)   | (0.169)  |
| Muslim                          | 0.150    | 0.015     | -0.214   | -0.020  | 0.069     | 0.165    |



|                  |          |           |         |         |          |          |
|------------------|----------|-----------|---------|---------|----------|----------|
|                  | (0.135)  | (0.167)   | (0.184) | (0.093) | (0.095)  | (0.169)  |
| Constant         | 3.313*** | -5.465*** | 0.544   | -0.215  | 2.824*** | -2.153** |
|                  | (0.756)  | (0.517)   | (0.779) | (0.509) | (0.525)  | (1.024)  |
| No. Observations | 582      | 582       | 582     | 582     | 582      | 582      |
| R-squared        | 0.485    | 0.498     | 0.088   | 0.106   | 0.385    | 0.146    |

---

\*\*\* p<0.01, \*\* p<0.05, \* p<0.10. Cluster-robust standard errors at household level in parentheses.

Notes: we also control for household expenditure during childhood and parents' education and household size during childhood.

Table S6. Child labour hours and employment status in adulthood, linear probability model with fixed effects. Male sample.

|                                     | (1)<br>Contributing<br>family worker | (2)<br>Own-account<br>worker | (3)<br>Employer      | (4)<br>Employee    | (5)<br>Other         | (6)<br>Vulnerable<br>employment |
|-------------------------------------|--------------------------------------|------------------------------|----------------------|--------------------|----------------------|---------------------------------|
| Child labour hours                  | 0.000<br>(0.010)                     | -0.001<br>(0.014)            | -0.015<br>(0.015)    | 0.005<br>(0.017)   | 0.011<br>(0.008)     | -0.001<br>(0.014)               |
| Child labour hours*age              | -0.000<br>(0.001)                    | 0.000<br>(0.001)             | 0.001<br>(0.001)     | -0.000<br>(0.001)  | -0.001<br>(0.001)    | 0.000<br>(0.001)                |
| Age                                 | -0.094**<br>(0.039)                  | 0.392***<br>(0.061)          | -0.355***<br>(0.071) | 0.120**<br>(0.048) | -0.063***<br>(0.019) | 0.298***<br>(0.072)             |
| Community shocks                    | -0.029<br>(0.046)                    | 0.108<br>(0.064)             | -0.147**<br>(0.071)  | 0.084*<br>(0.043)  | -0.015<br>(0.026)    | 0.079<br>(0.062)                |
| HH size                             | 0.012<br>(0.009)                     | 0.015<br>(0.016)             | -0.053***<br>(0.015) | -0.022<br>(0.014)  | 0.049***<br>(0.007)  | 0.027*<br>(0.015)               |
| Weekly hours of school (2° tertile) | -0.028<br>(0.053)                    | 0.105<br>(0.076)             | -0.010<br>(0.064)    | -0.033<br>(0.081)  | -0.033<br>(0.040)    | 0.077<br>(0.089)                |
| Weekly hours of school (3° tertile) | -0.019<br>(0.060)                    | -0.048<br>(0.080)            | 0.064<br>(0.086)     | -0.004<br>(0.071)  | 0.007<br>(0.036)     | -0.067<br>(0.092)               |
| Uncompleted primary school          | -0.097<br>(0.114)                    | -0.058<br>(0.169)            | -0.274<br>(0.268)    | 0.041<br>(0.145)   | 0.388*<br>(0.198)    | -0.155<br>(0.157)               |
| Primary                             | -0.097                               | 0.115                        | -0.305               | -0.037             | 0.325                | 0.017                           |

|                                 |          |         |           |         |           |         |
|---------------------------------|----------|---------|-----------|---------|-----------|---------|
|                                 | (0.069)  | (0.117) | (0.235)   | (0.090) | (0.202)   | (0.110) |
| Secondary                       | -0.015   | 0.192   | -0.134    | -0.109  | 0.065     | 0.178*  |
|                                 | (0.076)  | (0.114) | (0.245)   | (0.172) | (0.176)   | (0.097) |
| University                      | 0.206*** | -0.131  | -0.162    | 0.379** | -0.292*   | 0.075   |
|                                 | (0.064)  | (0.127) | (0.189)   | (0.179) | (0.160)   | (0.142) |
| Married                         | -0.086** | -0.040  | 0.295***  | -0.059  | -0.110*** | -0.126* |
|                                 | (0.036)  | (0.069) | (0.076)   | (0.063) | (0.031)   | (0.073) |
| No. of HH members in employment | 0.028    | -0.041  | 0.079***  | 0.050   | -0.115*** | -0.014  |
|                                 | (0.018)  | (0.030) | (0.022)   | (0.032) | (0.022)   | (0.025) |
| Orphan in adulthood             | -0.067   | 0.018   | 0.042     | -0.025  | 0.031     | -0.048  |
|                                 | (0.094)  | (0.123) | (0.109)   | (0.105) | (0.030)   | (0.110) |
| Rural area                      | 0.025    | 0.121   | -0.217*** | 0.014   | 0.058**   | 0.146   |
|                                 | (0.053)  | (0.096) | (0.066)   | (0.086) | (0.022)   | (0.115) |
| HH expenditure (2° quartile)    | -0.176** | 0.058   | 0.045     | 0.058   | 0.015     | -0.118  |
|                                 | (0.064)  | (0.094) | (0.072)   | (0.097) | (0.018)   | (0.074) |
| HH expenditure (3° quartile)    | -0.089   | 0.015   | 0.097     | -0.077  | 0.054     | -0.075  |
|                                 | (0.056)  | (0.084) | (0.074)   | (0.082) | (0.035)   | (0.083) |
| HH expenditure (4° quartile)    | -0.058   | -0.012  | 0.011     | 0.059   | 0.000     | -0.070  |
|                                 | (0.055)  | (0.108) | (0.098)   | (0.133) | (0.047)   | (0.098) |
| Catholic                        | -0.010   | 0.144   | -0.052    | 0.067   | -0.148*   | 0.134   |
|                                 | (0.068)  | (0.117) | (0.108)   | (0.219) | (0.074)   | (0.163) |
| Protestant                      | 0.063    | 0.117   | -0.093    | -0.083  | -0.004    | 0.180   |

|                  |         |           |          |          |         |           |
|------------------|---------|-----------|----------|----------|---------|-----------|
|                  | (0.058) | (0.093)   | (0.089)  | (0.157)  | (0.070) | (0.116)   |
| Muslim           | 0.101   | -0.044    | -0.186   | 0.168    | -0.039  | 0.057     |
|                  | (0.154) | (0.236)   | (0.288)  | (0.291)  | (0.149) | (0.288)   |
| Constant         | 1.360** | -4.689*** | 4.858*** | -1.127** | 0.598** | -3.328*** |
|                  | (0.507) | (0.710)   | (0.839)  | (0.515)  | (0.286) | (0.796)   |
| No. Observations | 635     | 635       | 635      | 635      | 635     | 635       |
| R-squared        | 0.251   | 0.315     | 0.250    | 0.096    | 0.431   | 0.170     |

---

\*\*\* p<0.01, \*\* p<0.05, \* p<0.10. Cluster-robust standard errors at household level in parentheses.

Notes: we also control for household expenditure during childhood and parents' education and household size during childhood.

Table S7. Threshold effects of child labour on the employment status in adulthood by type of child labour, linear probability model with fixed effects. Whole sample.

|                                               | (1)<br>Contributing<br>family worker | (2)<br>Own-account<br>worker | (3)<br>Employer    | (4)<br>Employee   | (5)<br>Other      | (6)<br>Vulnerable<br>employment |
|-----------------------------------------------|--------------------------------------|------------------------------|--------------------|-------------------|-------------------|---------------------------------|
| (a) 14 hours or more                          |                                      |                              |                    |                   |                   |                                 |
| ≥14 hours                                     | 0.457**<br>(0.174)                   | -0.021<br>(0.266)            | -0.497<br>(0.315)  | 0.068<br>(0.232)  | -0.008<br>(0.132) | 0.436<br>(0.284)                |
| ≥14 hours*age                                 | -0.038**<br>(0.015)                  | 0.007<br>(0.023)             | 0.040<br>(0.024)   | -0.009<br>(0.020) | 0.000<br>(0.011)  | -0.031<br>(0.024)               |
| (b) 14 hours or more spent in domestic chores |                                      |                              |                    |                   |                   |                                 |
| ≥14 hours                                     | 0.320<br>(0.269)                     | 0.133<br>(0.314)             | -0.387<br>(0.310)  | -0.102<br>(0.264) | 0.036<br>(0.204)  | 0.453*<br>(0.262)               |
| ≥14 hours*age                                 | -0.028<br>(0.021)                    | -0.013<br>(0.024)            | 0.032<br>(0.024)   | 0.012<br>(0.021)  | -0.004<br>(0.016) | -0.041*<br>(0.021)              |
| (c) 14 hours or more spent on the HH farm     |                                      |                              |                    |                   |                   |                                 |
| ≥14 hours                                     | 0.424<br>(0.356)                     | 0.073<br>(0.463)             | -0.589*<br>(0.345) | 0.313<br>(0.294)  | -0.221<br>(0.230) | 0.497<br>(0.406)                |
| ≥14 hours*age                                 | -0.036<br>(0.027)                    | -0.000<br>(0.035)            | 0.046*<br>(0.027)  | -0.028<br>(0.024) | 0.019<br>(0.019)  | -0.037<br>(0.033)               |

\*\*\* p<0.01, \*\* p<0.05, \* p<0.10

Notes: Each group from (a) to (c) presents results from a separate regression for all 7-15 years old children. (b) includes the variable 'Hours spent on the HH farm' and its interaction with age. (c) includes the variable 'Hours spent in domestic chores' and its interaction with age. Each regression has a common set of controls: age, education, rural area of residence, quintile of household expenditure, number of household members and number of household members in

employment, marital status, religion, loss of parents and community shocks during childhood. Cluster-robust standard errors at household level are in parentheses.

Table S8. Threshold effects of child labour on the employment status in adulthood by type of child labour, linear probability model with fixed effects. Female sample.

|                                               | (1)<br>Contributing<br>family worker | (2)<br>Own-account<br>worker | (3)<br>Employer      | (4)<br>Employee   | (5)<br>Other        | (6)<br>Vulnerable<br>employment |
|-----------------------------------------------|--------------------------------------|------------------------------|----------------------|-------------------|---------------------|---------------------------------|
| (a) 14 hours or more                          |                                      |                              |                      |                   |                     |                                 |
| ≥14 hours                                     | 0.903***<br>(0.245)                  | -0.010<br>(0.361)            | -0.694<br>(0.429)    | -0.159<br>(0.200) | -0.040<br>(0.154)   | 0.893**<br>(0.416)              |
| ≥14 hours*age                                 | -0.071***<br>(0.021)                 | -0.000<br>(0.031)            | 0.053<br>(0.033)     | 0.014<br>(0.018)  | 0.004<br>(0.013)    | -0.072**<br>(0.034)             |
| (b) 14 hours or more spent in domestic chores |                                      |                              |                      |                   |                     |                                 |
| ≥14 hours                                     | 0.770*<br>(0.389)                    | 0.279<br>(0.344)             | -0.876***<br>(0.302) | -0.080<br>(0.228) | -0.093<br>(0.332)   | 1.049***<br>(0.371)             |
| ≥14 hours*age                                 | -0.060*<br>(0.031)                   | -0.023<br>(0.027)            | 0.067***<br>(0.023)  | 0.009<br>(0.018)  | 0.007<br>(0.027)    | -0.083***<br>(0.030)            |
| (c) 14 hours or more spent on the HH farm     |                                      |                              |                      |                   |                     |                                 |
| ≥14 hours                                     | 1.799***<br>(0.347)                  | -0.137<br>(0.439)            | -1.110**<br>(0.509)  | 0.081<br>(0.175)  | -0.633**<br>(0.258) | 1.662***<br>(0.486)             |
| ≥14 hours*age                                 | -0.145***<br>(0.026)                 | 0.011<br>(0.034)             | 0.083**<br>(0.040)   | -0.002<br>(0.015) | 0.053**<br>(0.021)  | -0.133***<br>(0.037)            |

\*\*\* p<0.01, \*\* p<0.05, \* p<0.10

Notes: Each group from (a) to (c) presents results from a separate regression for all 7-15 years old children. (b) includes the variable 'Hours spent on the HH farm' and its interaction with age. (c) includes the variable 'Hours spent in domestic chores' and its interaction with age. Each regression has a common set of controls: age, education, rural area of residence, quintile of household expenditure, number of household members and number of household members in

employment, marital status, religion, loss of parents and community shocks during childhood. Cluster-robust standard errors at household level are in parentheses.



Table S9. Threshold effects of child labour on the employment status in adulthood by type of child labour, linear probability model with fixed effects. Male sample.

|                                               | (1)<br>Contributing<br>family worker | (2)<br>Own-account<br>worker | (3)<br>Employer   | (4)<br>Employee   | (5)<br>Other       | (6)<br>Vulnerable<br>employment |
|-----------------------------------------------|--------------------------------------|------------------------------|-------------------|-------------------|--------------------|---------------------------------|
| (a) 14 hours or more                          |                                      |                              |                   |                   |                    |                                 |
| ≥14 hours                                     | 0.128<br>(0.236)                     | 0.062<br>(0.368)             | -0.452<br>(0.339) | 0.112<br>(0.402)  | 0.150<br>(0.193)   | 0.190<br>(0.429)                |
| ≥14 hours*age                                 | -0.012<br>(0.017)                    | 0.003<br>(0.031)             | 0.037<br>(0.026)  | -0.015<br>(0.032) | -0.012<br>(0.016)  | -0.009<br>(0.035)               |
| (b) 14 hours or more spent in domestic chores |                                      |                              |                   |                   |                    |                                 |
| ≥14 hours                                     | -0.468*<br>(0.237)                   | 0.163<br>(0.398)             | 0.401<br>(0.568)  | -0.430<br>(0.634) | 0.334*<br>(0.169)  | -0.305<br>(0.474)               |
| ≥14 hours*age                                 | 0.035*<br>(0.018)                    | -0.020<br>(0.031)            | -0.028<br>(0.045) | 0.041<br>(0.051)  | -0.028*<br>(0.014) | 0.015<br>(0.037)                |
| (c) 14 hours or more spent on the HH farm     |                                      |                              |                   |                   |                    |                                 |
| ≥14 hours                                     | 0.027<br>(0.392)                     | -0.002<br>(0.622)            | -0.472<br>(0.294) | 0.456<br>(0.430)  | -0.008<br>(0.268)  | 0.025<br>(0.490)                |
| ≥14 hours*age                                 | -0.005<br>(0.029)                    | 0.006<br>(0.047)             | 0.039<br>(0.025)  | -0.042<br>(0.034) | 0.003<br>(0.022)   | 0.001<br>(0.040)                |

\*\*\* p<0.01, \*\* p<0.05, \* p<0.10

Notes: Each group from (a) to (c) presents results from a separate regression for all 7-15 years old children. (b) includes the variable 'Hours spent in the HH farm' and its interaction with age. (c) includes the variable 'Hours spent in domestic chores' and its interaction with age. Each regression has a common set of

controls: age, education, rural area of residence, quintile of household expenditure, number of household members and number of household members in employment, marital status, religion, loss of parents and community shocks during childhood. Cluster-robust standard errors at household level are in parentheses

Table S10. Assessing the gender gap: correlated random effects model without and with gender interactions. Whole sample.

|                           | (1)                        | (2)                        |
|---------------------------|----------------------------|----------------------------|
|                           | Contributing family worker | Contributing family worker |
| ≥14 hours of child labour | 0.457**<br>(0.224)         | 0.013<br>(0.335)           |
| Age                       | -0.216***<br>(0.032)       | -0.096**<br>(0.043)        |
| Female                    | 0.153***<br>(0.020)        | -0.142<br>(0.181)          |
| ≥14 hours*age             | -0.038**<br>(0.018)        | -0.002<br>(0.027)          |
| ≥14 hours*female          |                            | 0.934**<br>(0.449)         |
| ≥14 hours*female*age      |                            | -0.075**<br>(0.037)        |
| Female*age                |                            | -0.227***<br>(0.051)       |
| Haya tribe                | 0.003<br>(0.040)           | 0.003<br>(0.040)           |
| Hangaza tribe             | -0.060<br>(0.048)          | -0.060<br>(0.048)          |
| Nyambo tribe              | -0.045                     | -0.045                     |

\*\*\* p<0.01, \*\* p<0.05, \* p<0.1

Notes: Additional controls include age, education, rural area of residence, quintile of household expenditure, number of household members and number of household members in employment, marital status, religion, loss of parents and community shocks during childhood and cluster means of time varying variables. Robust standard errors in parentheses.

Table S11. Child labour hours and employment status in adulthood, linear probability model with fixed effects. The category “Other” is excluded from the sample.

| VARIABLES              | (1)<br>Contributing<br>family worker | (2)<br>Own-account<br>worker | (3)<br>Employer    | (4)<br>Employee   | (6)<br>Vulnerable<br>employment |
|------------------------|--------------------------------------|------------------------------|--------------------|-------------------|---------------------------------|
| (a) Whole sample       |                                      |                              |                    |                   |                                 |
| Child labour hours     | 0.022*<br>(0.012)                    | -0.007<br>(0.012)            | -0.023*<br>(0.012) | 0.008<br>(0.010)  | 0.015<br>(0.011)                |
| Child labour hours*age | -0.002*<br>(0.001)                   | 0.000<br>(0.001)             | 0.002**<br>(0.001) | -0.001<br>(0.001) | -0.001<br>(0.001)               |
| Obs.                   | 1,107                                | 1,107                        | 1,107              | 1,107             | 1,107                           |
| (b) Female sample      |                                      |                              |                    |                   |                                 |
| Child labour hours     | 0.051**<br>(0.021)                   | -0.008<br>(0.018)            | -0.039*<br>(0.020) | -0.004<br>(0.006) | 0.043*<br>(0.021)               |
| Child labour hours*age | -0.004**<br>(0.002)                  | 0.000<br>(0.001)             | 0.003*<br>(0.002)  | 0.000<br>(0.000)  | -0.004**<br>(0.002)             |
| Obs.                   | 518                                  | 518                          | 518                | 518               | 518                             |
| (c) Male sample        |                                      |                              |                    |                   |                                 |
| Child labour hours     | 0.004<br>(0.012)                     | -0.006<br>(0.016)            | -0.010<br>(0.017)  | 0.012<br>(0.018)  | -0.002<br>(0.018)               |

|                        |         |         |         |         |         |
|------------------------|---------|---------|---------|---------|---------|
| Child labour hours*age | -0.000  | 0.000   | 0.001   | -0.001  | 0.000   |
|                        | (0.001) | (0.001) | (0.001) | (0.001) | (0.001) |
| Obs.                   | 589     | 589     | 589     | 589     | 589     |

---

\*\*\* p<0.01, \*\* p<0.05, \* p<0.10

Notes: Each group from (a) to (c) presents results from a separate regression for children between 7 and 15 years old. (a) considers the whole sample. (b) considers the female sample. (c) considers the male sample. Each regression has a common set of controls: age, education, rural area of residence, quintile of household expenditure, number of household members and number of household members in employment, marital status, religion, loss of parents and community shocks during childhood. Cluster-robust standard errors at household level are in parentheses.

Table S12. Threshold effects of child labour on the employment status in adulthood, linear probability model with fixed effects. The category “Other” is excluded from the sample.

| VARIABLES         | (1)<br>Contributing<br>family worker | (2)<br>Own-account<br>worker | (3)<br>Employer    | (4)<br>Employee   | (6)<br>Vulnerable<br>employment |
|-------------------|--------------------------------------|------------------------------|--------------------|-------------------|---------------------------------|
| (a) Whole sample  |                                      |                              |                    |                   |                                 |
| ≥14 hours         | 0.521**<br>(0.244)                   | -0.066<br>(0.279)            | -0.471<br>(0.305)  | 0.016<br>(0.222)  | 0.455<br>(0.307)                |
| ≥14 hours*age     | -0.042**<br>(0.020)                  | 0.010<br>(0.024)             | 0.038<br>(0.023)   | -0.006<br>(0.019) | -0.032<br>(0.025)               |
| Obs.              | 1,107                                | 1,107                        | 1,107              | 1,107             | 1,107                           |
| (b) Female sample |                                      |                              |                    |                   |                                 |
| ≥14 hours         | 0.992***<br>(0.320)                  | 0.096<br>(0.424)             | -0.782*<br>(0.412) | -0.305<br>(0.210) | 1.087**<br>(0.419)              |
| ≥14 hours*age     | -0.075**<br>(0.027)                  | -0.011<br>(0.034)            | 0.061*<br>(0.031)  | 0.026<br>(0.019)  | -0.086**<br>(0.034)             |
| Obs               | 518                                  | 518                          | 518                | 518               | 518                             |
| (c) Male sample   |                                      |                              |                    |                   |                                 |
| ≥14 hours         | 0.160<br>(0.291)                     | -0.029<br>(0.371)            | -0.287<br>(0.362)  | 0.155<br>(0.443)  | 0.132<br>(0.462)                |

|                     |         |         |         |         |         |
|---------------------|---------|---------|---------|---------|---------|
| $\geq 14$ hours*age | -0.014  | 0.010   | 0.024   | -0.020  | -0.004  |
|                     | (0.022) | (0.031) | (0.029) | (0.037) | (0.038) |
| Obs.                | 589     | 589     | 589     | 589     | 589     |

---

\*\*\* p<0.01, \*\* p<0.05, \* p<0.10

Notes: Each group from (a) to (c) presents results from a separate regression for children between 7 and 15 years old. (a) considers the whole sample. (b) considers the female sample. (c) considers the male sample. Each regression has a common set of controls: age, education, rural area of residence, quintile of household expenditure, number of household members and number of household members in employment, marital status, religion, loss of parents and community shocks during childhood. Cluster-robust standard errors at household level are in parentheses.
